# Supplementary material for: Elongator and codon bias regulate protein levels in mammalian peripheral neurons
Source: PubMed Central journal article supplement (PMC5832791; doi:10.1038/s41467-018-03221-z), 2018-03-01
Supplement: 41467_2018_3221_MOESM1_ESM.pdf [file 41467_2018_3221_MOESM1_ESM.pdf]

# **Elongator and codon bias regulate protein levels in mammalian peripheral neurons**

Goffena et al.

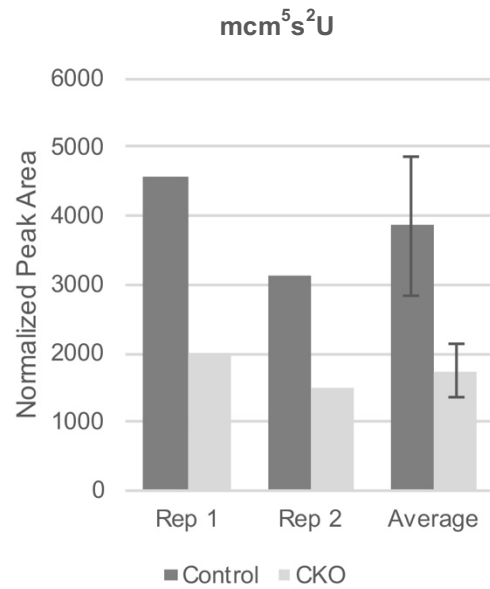

**Supplementary Figure 1.** Liquid chromatography-mass spectrometry (LC-MS) based tRNA modification analysis shows that mcm<sup>5</sup>s<sup>2</sup>-modified uridine levels are depleted in mammalian neurons in the absence of Elongator. DRG were collected and pooled from 4 control and 4 CKO embryos per biological replicate. Peak area values of mcm<sup>5</sup>s<sup>2</sup>U are shown normalized to the quantity of purified tRNA for each sample.

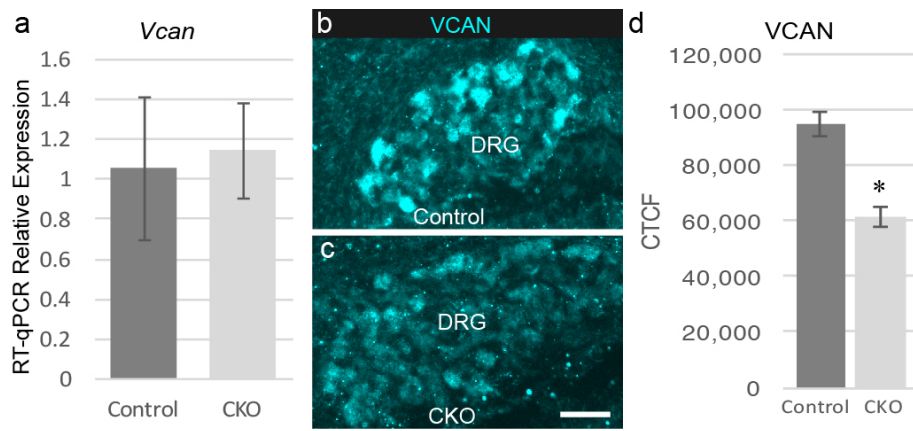

**Supplementary Figure 2.** Depleted levels of VCAN in Elongator CKO embryos. a) RT-qPCR confirms normal levels of *Vcan* transcript ( $P=0.78$ ). b-d) Quantitative immunohistochemistry confirms decreased levels of VCAN protein ( $P<0.001$ ). Error bars denote SD in a, and SEM in d. Scale bar: 40um

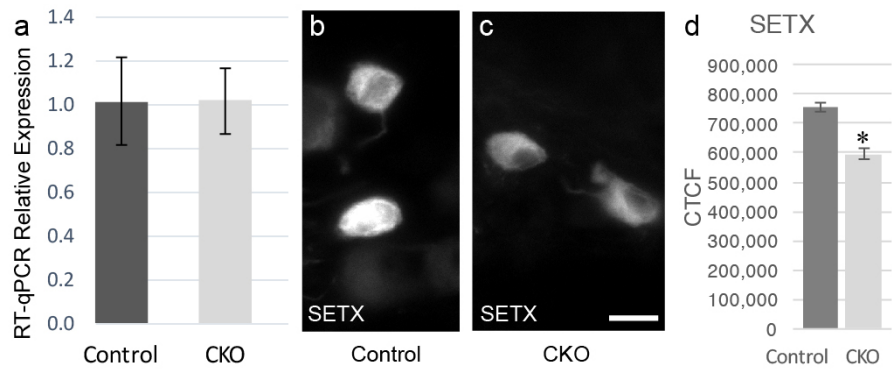

**Supplementary Figure 3.** Depleted levels of SETX in Elongator CKO embryos. a) RT-qPCR confirms normal levels of *Setx* transcript ( $P=1.0$ ). b-d) Quantitative immunohistochemistry confirms decreased levels of SETX protein ( $P<0.001$ ). Error bars denote SD in a, and SEM in d. Scale bar: 8 $\mu$ m.

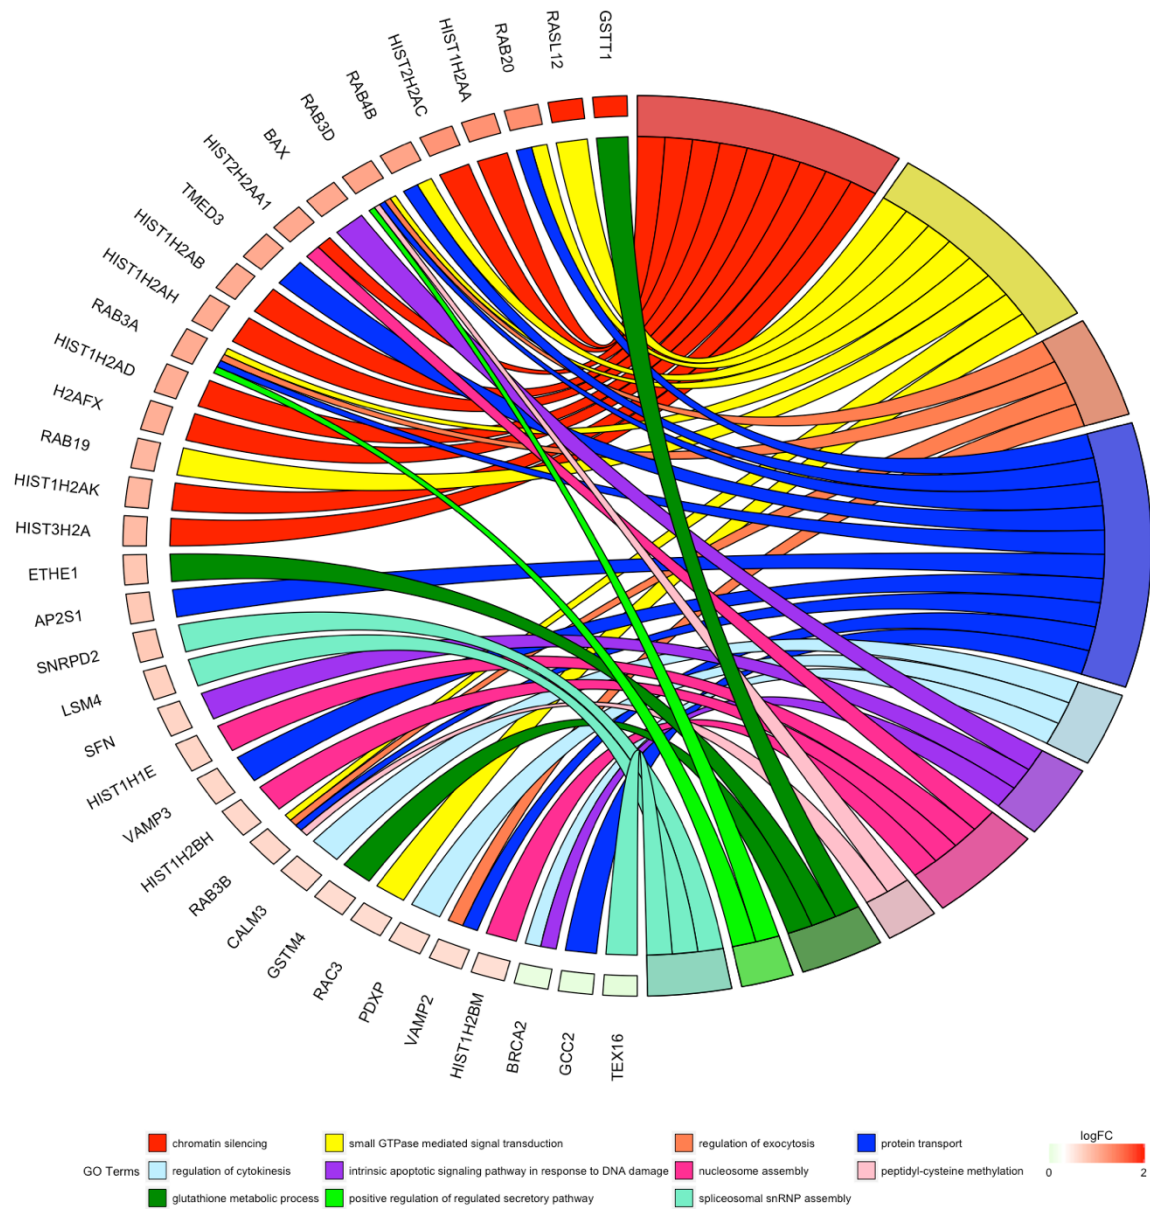

**Supplementary Figure 4.** Selected, significantly enriched GO biological processes for genes that are strong candidates for Elongator regulation (downregulated proteins encoded by genes with  $\geq 1005$  codons and an AA/AG ratio  $> 1.3$  and upregulated proteins encoded by genes with  $\leq 300$  codons and an AA/AG ratio  $< 0.3$ ). Proteins are arranged by decreasing log<sub>10</sub> fold change from top to bottom. Ribbons connect GO terms to their associated proteins. \*All genes were transcribed normally.
