# Supplementary material for: Elongator and codon bias regulate protein levels in mammalian peripheral neurons
Source: PubMed Central journal article supplement (PMC5832791; doi:10.1038/s41467-018-03221-z), 2018-03-01
Supplement: 41467_2018_3221_MOESM3_ESM.pdf [file 41467_2018_3221_MOESM3_ESM.pdf]

## Description of Additional Supplementary Files

**File Name:** Supplementary Data 1

**Description:** Proteome data for all normally transcribed genes (transcript fold change  $<1.5$  and  $>-1.5$ ) and codon usage for Lys, Gln, and Glu.

**File Name:** Supplementary Data 2

**Description:** Numerical data for Fig. 3b-e.

**File Name:** Supplementary Data 3

**Description:** List of genes within the mouse ORFeome that meet stringent indicators of Elongator dependence ( $\geq 1755$  codons with AA:AG $>1.3$  or  $\leq 150$  codons with AA:AG  $<0.3$ ).

**File Name:** Supplementary Data 4

**Description:** List of genes within the human ORFeome that meet less stringent indicators of Elongator dependence ( $\geq 1005$  codons with AA:AG $>1.3$  or  $\leq 150$  codons with AA:AG  $<0.3$ ).

**File Name:** Supplementary Data 5

**Description:** Potential Elongator targets: genes that were transcribed normally (transcript fold change  $< 1.5$  and  $> -1.5$ ) and consist of  $\geq 1755$  total codons with an AA:AG ratio  $> 1.3$ .

**File Name:** Supplementary Data 6

**Description:** Misregulated double-strand break repair genes (protein fold change  $\leq -2.0$ , or  $\geq 2.0$ ).

**File Name:** Supplementary Data 7

**Description:** Codon usage of genes involved in double-strand break repair via nonhomologous end joining (NHEJ).

**File Name:** Supplementary Data 8

**Description:** Potential Elongator targets: genes that were transcribed normally (transcript fold change  $< 1.5$  and  $> -1.5$ ) and consist of  $\leq 150$  total codons with an AA:AG ratio  $< 0.2$ .

**File Name:** Supplementary Data 9

**Description:** List of upregulated genes that were used to determine GO biological processes: genes encoding proteins with a fold change  $\geq 2$  and an AA:AG ratio  $< 0.3$  and transcript size  $\leq 300$  codons.
